# Supplementary material for: Surface passivation enabled-structural engineering of I-III-VI2 nanocrystal photocatalysts
Source: Royal Society of Chemistry journal article supplement (doi:10.1039/d0ta01501f), 2020-01-01
Supplement: d0ta01501f1.pdf [file d0ta01501f1.pdf]

## Supporting Information

### Surface Passivation Enabled-Structural Engineering of I-III-VI<sub>2</sub> Nanocrystal Photocatalyst

Yuemei Li<sup>a</sup>, Jia Liu<sup>a,\*</sup>, Xiaodong Wan<sup>a</sup>, Rongrong Pan<sup>a</sup>, Bing Bai<sup>a</sup>, Hongzhi Wang<sup>a</sup>,

Xiongzhong Cao<sup>b</sup>, Jiatao Zhang<sup>a,\*</sup>

<sup>a</sup> Beijing Key Laboratory of Construction-Tailorable Advanced Functional Materials and Green Applications, Experimental Center of Advanced Materials, School of Materials Science & Engineering, Beijing Institute of Technology, Beijing, 100081, PR China

<sup>b</sup> Institute of High Energy Physics, Chinese Academy of Science, Beijing, 100049, PR China

E-mail: [liujia86@bit.edu.cn](mailto:liujia86@bit.edu.cn); [Zhangjt@bit.edu.cn](mailto:Zhangjt@bit.edu.cn)

**Table S1.** The elemental composition of the samples obtained from In<sup>3+</sup>-for-Cu<sup>+</sup> cation exchange in Cu<sub>7</sub>S<sub>4</sub> NCs under different reaction conditions. Determined by EDS analysis except otherwise specified.

| Sample                                  | Cu (atomic %) | In (atomic %) | S (atomic %) | Cu : In : S (molar ratio) |
|-----------------------------------------|---------------|---------------|--------------|---------------------------|
| Pristine NCs <sup>a</sup>               | 63.6          | 0             | 36.4         | 3.49:///2.00              |
| In:Cu = 4:1                             | 63.21         | 0             | 36.78        | 3.44:///2.00              |
| In:Cu = 2:1                             | 23.23         | 27.02         | 48.25        | 0.96:1.12:2.00            |
| In:Cu = 1:1                             | 26.67         | 25.26         | 48.06        | 1.11:1.05:2.00            |
| In:Cu = 0.5:1                           | 36.43         | 19.47         | 44.10        | 1.65:0.88:2.00            |
| In:Cu = 0.5:1 <sup>b</sup>              | 27.46         | 24.04         | 48.49        | 1.13:0.99:2.00            |
| In:Cu = 2:1, 0 min, 1 mL of 1-DDT       | 52.85         | 7.25          | 39.90        | 2.65:0.36:2.00            |
| In:Cu = 2:1, 0 min, 1 mL of t-DDT       | 26.75         | 24.98         | 48.27        | 1.11:1.04:2.00            |
| In:Cu = 1:1, 5 min, 50 $\mu$ L of 1-DDT | 26.10         | 25.54         | 48.36        | 1.08:1.06:2.00            |

- a. The data are cited from our previous publication (ACS Appl. Mater. Interfaces 2019, 11, 27170).
- b. The data were obtained by XPS elemental analysis.

**Table S2.** The elemental composition of the samples obtained from In<sup>3+</sup>-for-Cu<sup>+</sup> cation exchange in Cu<sub>7</sub>S<sub>4</sub> or Cu<sub>2</sub>S NCs (with In<sup>3+</sup> to Cu<sup>+</sup> ratio controlled at 2:1) under different reaction times. Determined by EDS analysis.

| Sample                               | Cu (atomic %) | In (atomic %) | S (atomic %) | Cu : In : S (molar ratio) |
|--------------------------------------|---------------|---------------|--------------|---------------------------|
| Cu <sub>2</sub> S 30min              | 55.58         | 2.99          | 41.43        | 2.68:0.14:2.00            |
| Cu <sub>7</sub> S <sub>4</sub> 30min | 54.09         | 3.53          | 42.37        | 2.55:0.17:2.00            |
| Cu <sub>2</sub> S 90min              | 38.16         | 19.17         | 42.66        | 1.79:0.90:2.00            |
| Cu <sub>7</sub> S <sub>4</sub> 90min | 27.57         | 22.73         | 49.69        | 1.11:0.91:2.00            |

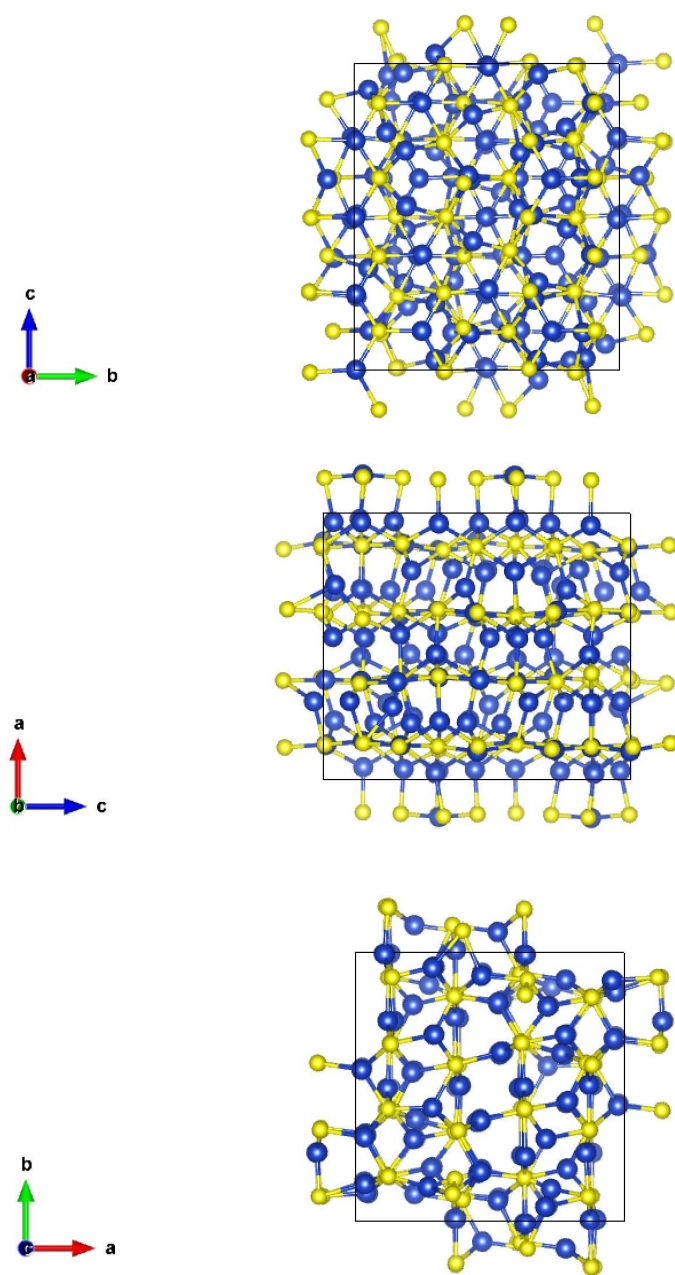

**Figure S1.** Schematic representation of the crystal structure of  $\text{Cu}_7\text{S}_4$  viewed along the  $a$ -axis,  $b$ -axis and  $c$ -axis, respectively. Drawn by VESTA.

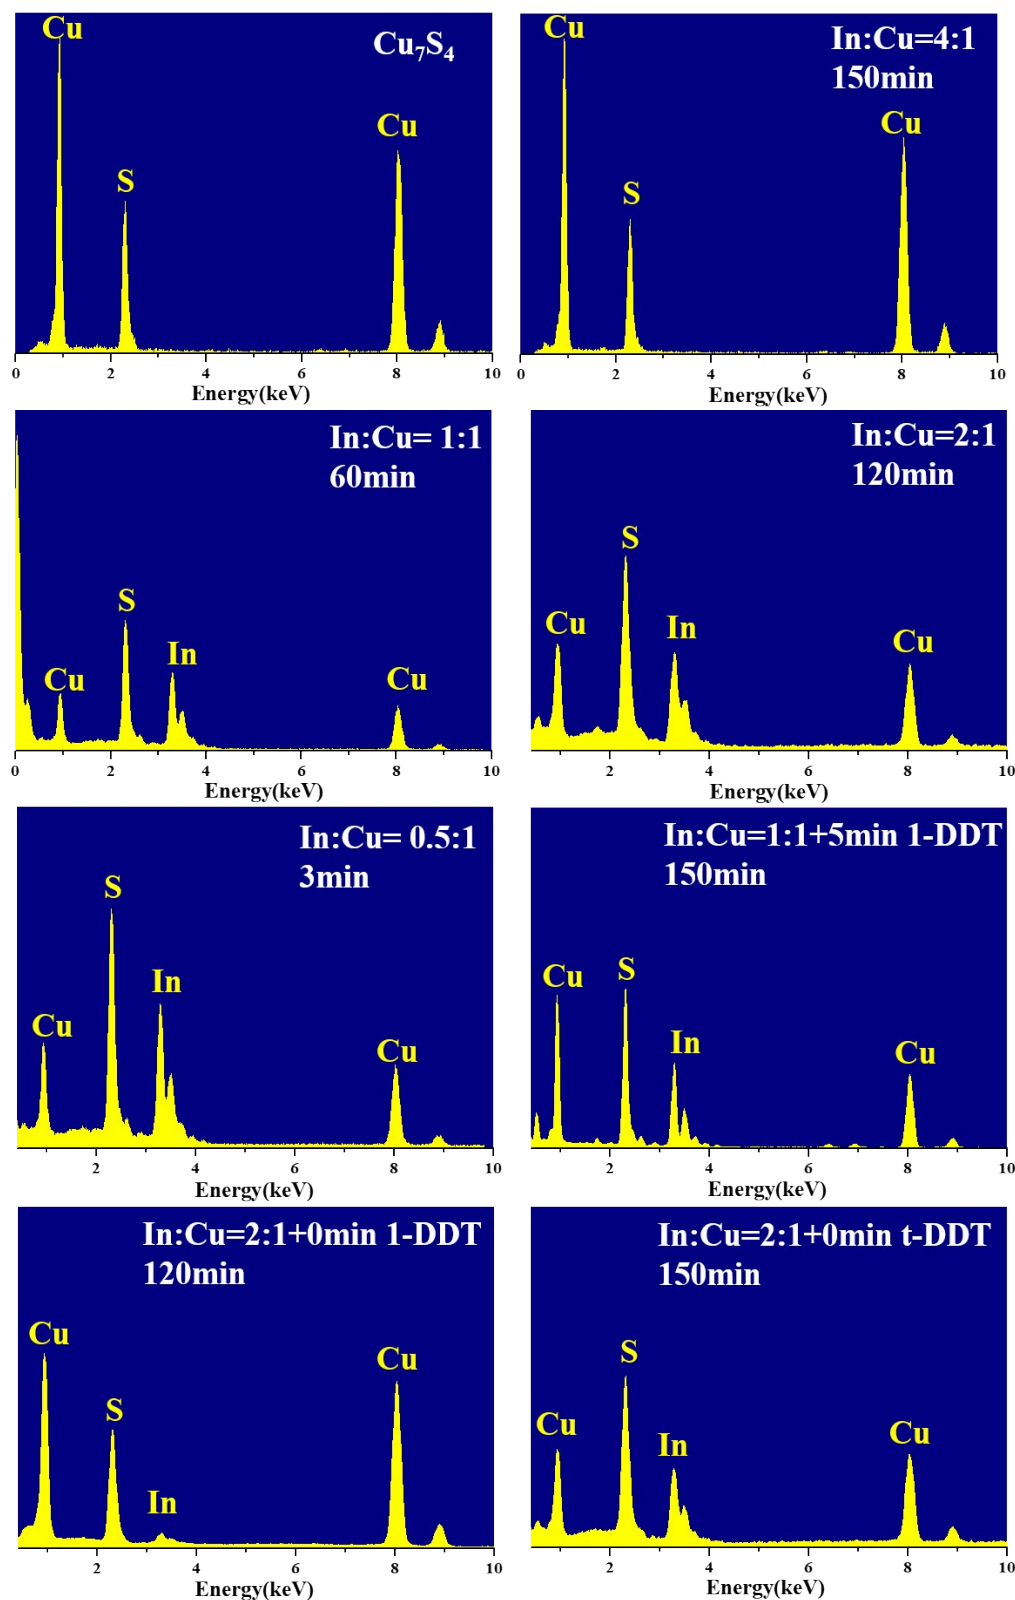

**Figure S2.** The EDS spectra of the pristine Cu<sub>7</sub>S<sub>4</sub> NCs and the products derived from In<sup>3+</sup>-for-Cu<sup>+</sup> cation exchange in Cu<sub>7</sub>S<sub>4</sub> NCs under different reaction conditions. The spectra were collected over a transmission electron microscope (FEI Tecnai G2 F20 S-Twin, an acceleration voltage of 200kV) equipped with an X-ray energy-dispersive spectroscopy detector.

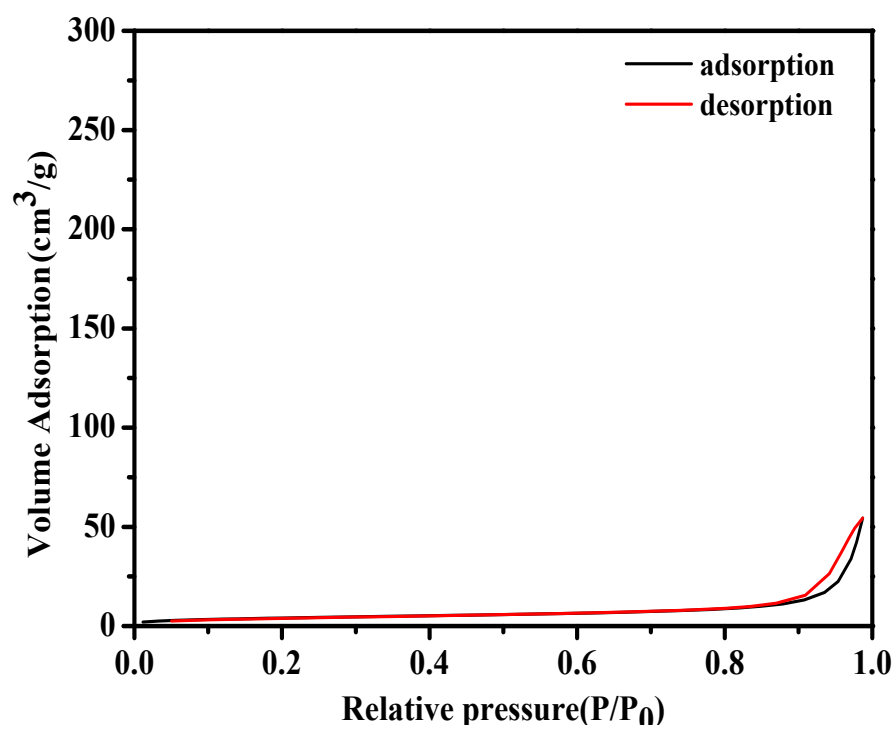

**Figure S3.** The N<sub>2</sub> adsorption-desorption isotherms of pristine Cu<sub>7</sub>S<sub>4</sub> NCs.

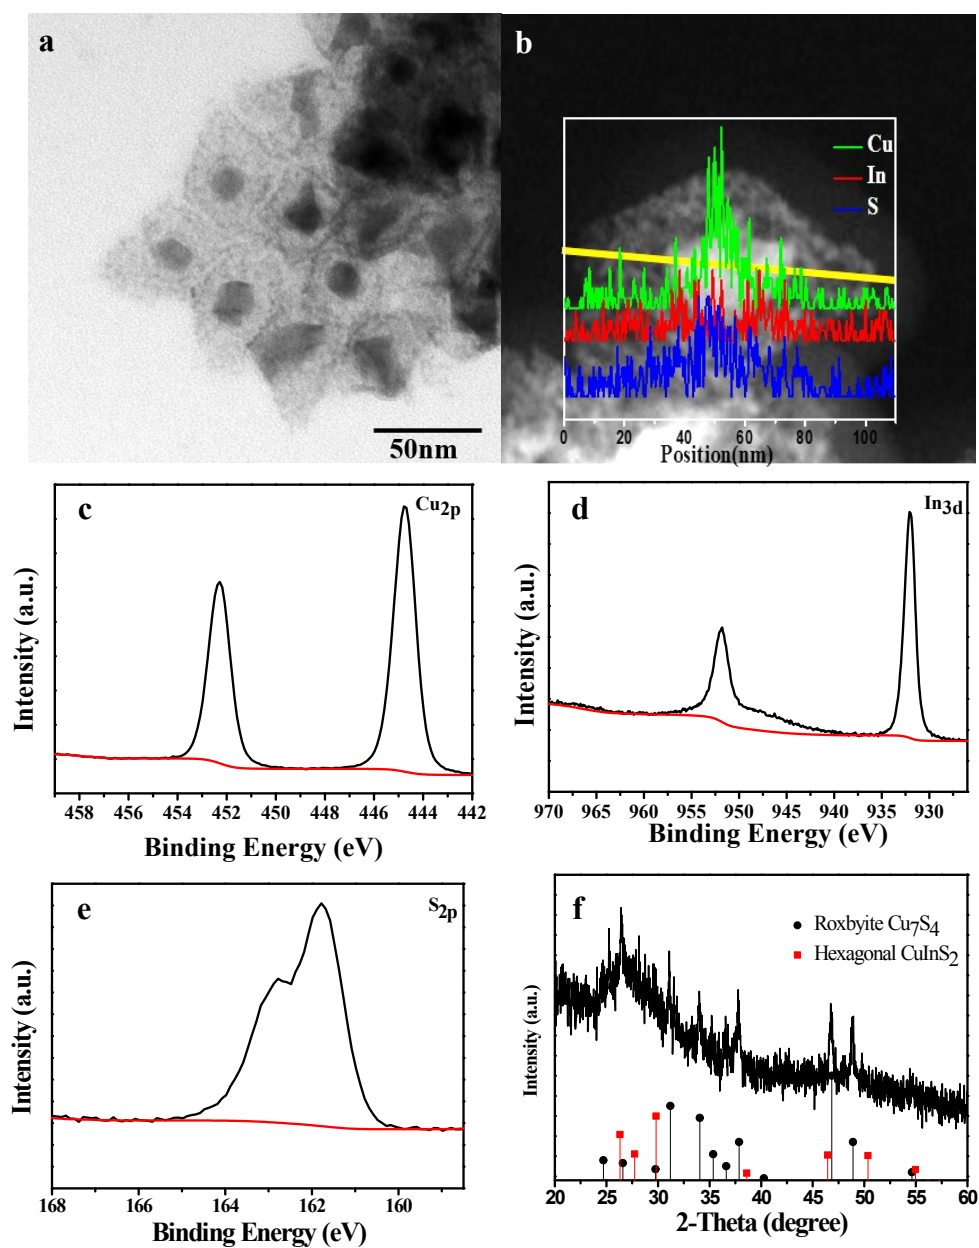

**Figure S4.** (a) The TEM image, (b) HAADF-STEM image (inset: the corresponding EDS line-scan profiles), (c-e) XPS spectra and (f) XRD pattern of the product derived from  $\text{In}^{3+}$ -for- $\text{Cu}^+$  cation exchange in  $\text{Cu}_7\text{S}_4$  NCs with the  $\text{In}^{3+}$  to  $\text{Cu}^+$  ratio controlled at 0.5:1.

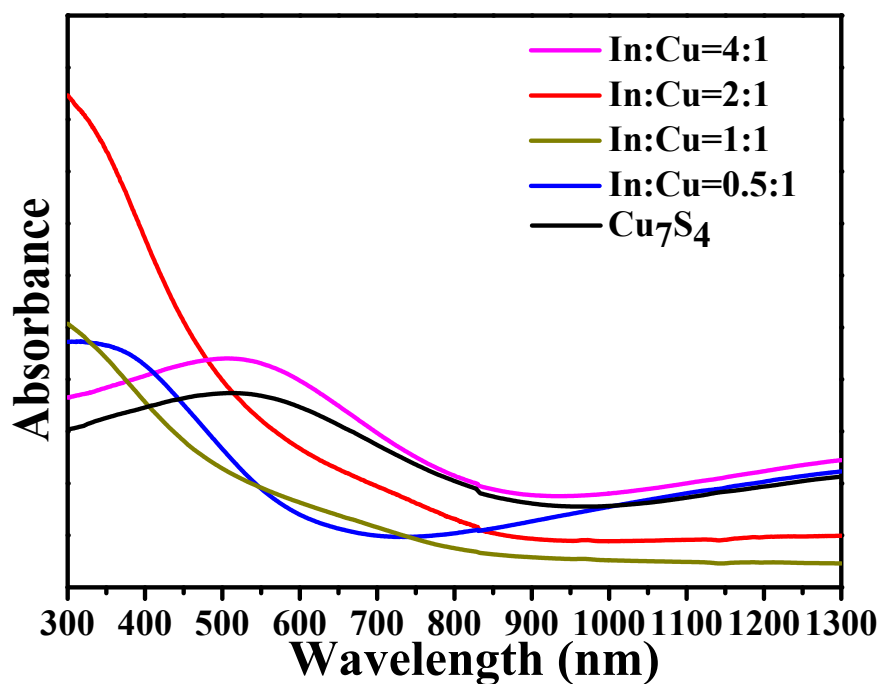

**Figure S5.** The UV-vis-NIR absorption spectra of  $\text{Cu}_7\text{S}_4$  NCs and the products derived from  $\text{In}^{3+}$ -for- $\text{Cu}^+$  cation exchange in  $\text{Cu}_7\text{S}_4$  NCs under different reaction conditions.

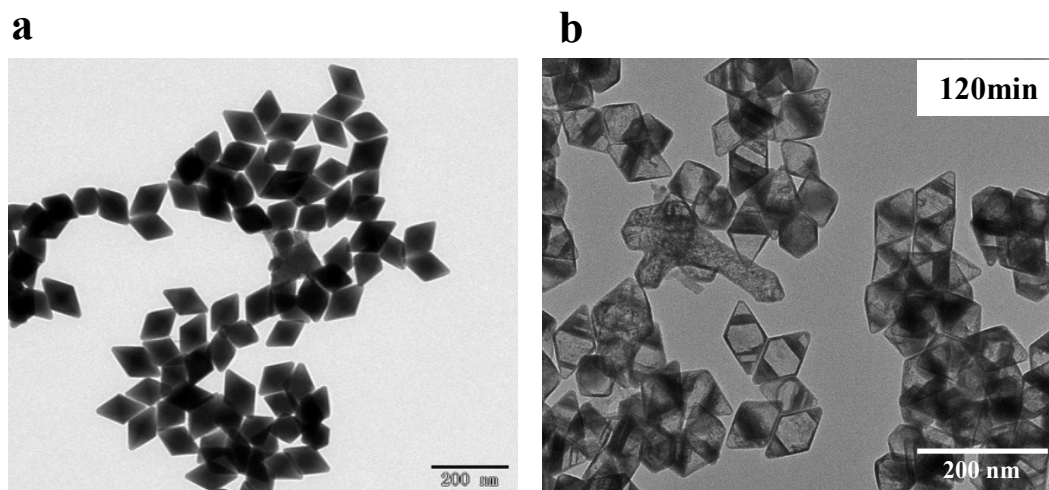

**Figure S6.** The TEM images of (a) pristine  $\text{Cu}_2\text{S}$  NCs and (b) the product (120 min) derived from  $\text{In}^{3+}$ -for- $\text{Cu}^+$  cation exchange in  $\text{Cu}_2\text{S}$  NCs with the  $\text{In}^{3+}$  to  $\text{Cu}^+$  ratio controlled at 2:1.

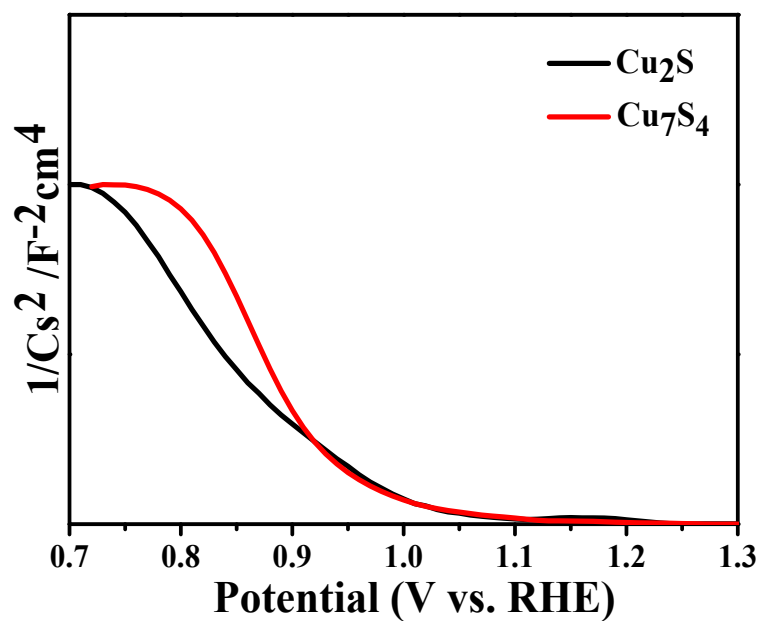

**Figure S7.** The Mott-Schottky curves of  $\text{Cu}_7\text{S}_4$  and  $\text{Cu}_2\text{S}$  NCs.

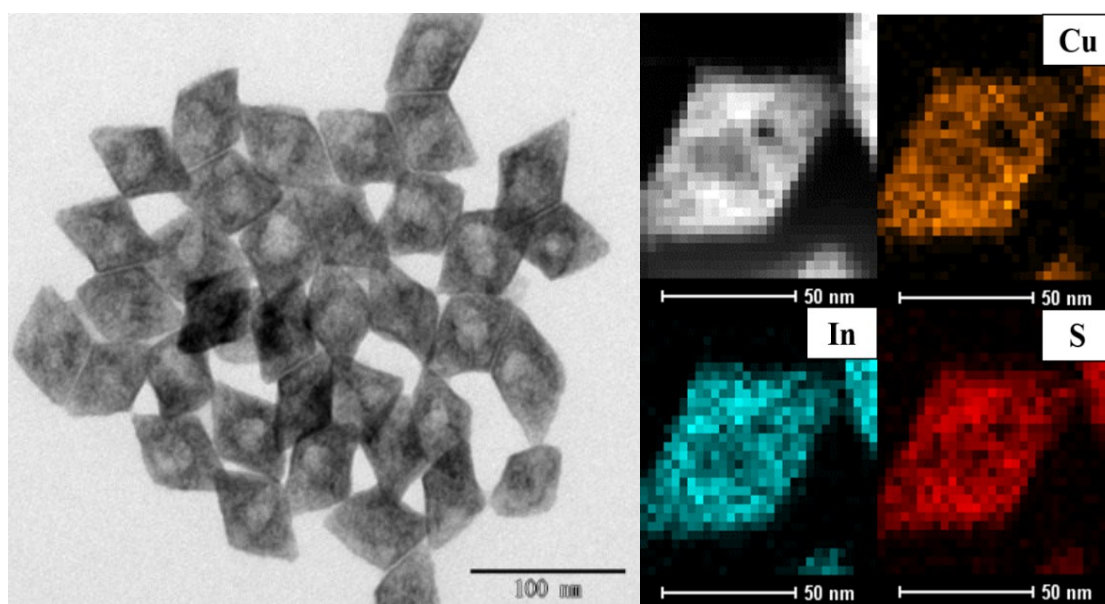

**Figure S8.** The TEM image, HAADF-STEM image and the corresponding STEM-EDS elemental maps for the product derived from  $\text{In}^{3+}$ -for- $\text{Cu}^+$  cation exchange in  $\text{Cu}_7\text{S}_4$  NCs under the condition where the  $\text{In}^{3+}$  to  $\text{Cu}^+$  ratio was controlled at 1:1 with the addition of 50  $\mu\text{L}$  of 1-DDT into the system 5 min after initiation of the reaction.

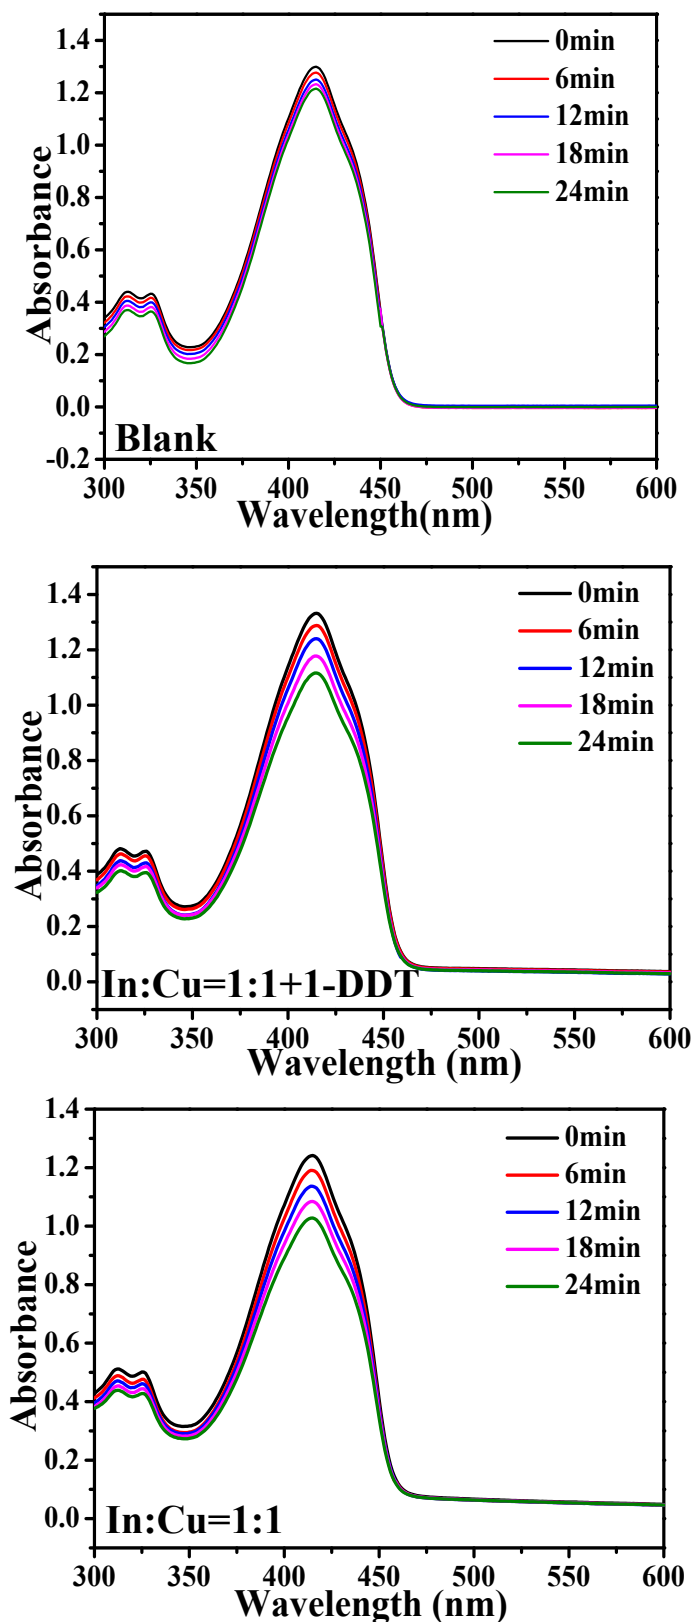

**Figure S9.** Normalized absorbance of the DPBF in the absence (blank) or presence of different CuInS<sub>2</sub> NCs that are obtained under varied reaction conditions. The decomposing of DPBF experiments were carried out under Xe lamp with 600 nm cutoff filter.
